1 **Title: Intergenerational effects of early adversity on survival in wild baboons**

2 Matthew N. Zippel<sup>1</sup>, Elizabeth A. Archie<sup>2,3</sup>, Jenny Tung<sup>1,3,4,5</sup>, Jeanne Altmann<sup>3,6</sup>, Susan C.

3 Alberts<sup>1,3,4</sup>

4 <sup>1</sup> Department of Biology, Duke University

5 <sup>2</sup> Department of Biological Sciences, University of Notre Dame

6 <sup>3</sup> Institute of Primate Research, National Museums of Kenya

7 <sup>4</sup> Department of Evolutionary Anthropology, Duke University

8 <sup>5</sup> Duke Population Research Institute, Duke University

9 <sup>6</sup> Department of Ecology and Evolutionary Biology, Princeton University

10 Corresponding Author: Susan Alberts, [alberts@duke.edu](mailto:alberts@duke.edu)

11

12 **Abstract: In humans and nonhuman animals, early life adversity can affect an individual's**  
13 **health, survival, and fertility for many years after the adverse experience. However,**  
14 **whether early life adversity also imposes intergenerational effects on the exposed**  
15 **individual's offspring is not well understood. Here, we fill this gap by leveraging**  
16 **prospective, longitudinal data on a wild, long-lived primate. We find that juveniles whose**  
17 **mothers experienced early life adversity exhibit high mortality before age 4, and this effect**  
18 **is independent of the juvenile's own experience of early adversity. Furthermore, our results**  
19 **point towards a strong role for classic parental effects in driving these effects: mothers that**  
20 **experienced early life adversity displayed reduced viability in adulthood, which in turn led**  
21 **to reductions in offspring survival. Importantly, these mothers' juvenile offspring often**  
22 **preceded them in death by 1 to 2 years, indicating that, for high adversity mothers, the**  
23 **quality of maternal care declines near the end of life. While we cannot exclude direct effects**  
24 **of a parent's environment on offspring quality (e.g., transgenerational epigenetic changes),**  
25 **our results are most consistent with a classic parental effect, in which the environment**  
26 **experienced by a parent affects its future phenotype and therefore its offspring's**  
27 **phenotype. Together, our findings demonstrate that adversity experienced by individuals**  
28 **in one generation can have strong effects on the survival of offspring in the next generation,**  
29 **even if those offspring did not themselves experience early adversity.**

30 An individual's health, survival, and fertility can be profoundly shaped by its early life  
31 environment (1). For example, in humans, low early life socioeconomic status predicts increased  
32 risk of coronary heart disease (2–4), stroke (2, 5, 6), type II diabetes (7), poor perceived health  
33 (8), and all-cause mortality (9, 10) in adulthood. Similarly, numerous studies of wild mammals  
34 (11–14) and birds (15–17) find that adult fecundity is reduced in animals that experienced

35 adverse early life environments, and a few have also found an effect of early life adversity on  
36 adult survival (13–15, 18).

37         If the effects of early adversity extend to the descendants of exposed individuals, the  
38 epidemiological and evolutionary impact of these effects would be further amplified. However,  
39 evidence from humans for intergenerational effects that result directly from the early life  
40 experience of the parent is mixed, as studies have produced somewhat contradictory results (19–  
41 22). For example, a study of the Överkalix population in Sweden identified strong, contrasting  
42 effects of grandparents' exposure to early-life food scarcity on grand-offspring survival,  
43 depending on small differences in the age at which the grandparent was exposed to scarcity (22).  
44 Similarly, two studies of the same population exposed *in utero* to the Dutch hunger winter (a  
45 well-studied famine that resulted from a German blockade of the Netherlands during the winter  
46 of 1944-1945) found contradictory, sex-specific intergenerational effects, in one case suggesting  
47 an intergenerational effect that depended only upon the mother's early experience (20), and in  
48 the other case an effect that depended only upon the father's early experience (19). Furthermore,  
49 any possible effects of parental or grandparental adversity on future generations are assumed to  
50 be transgenerational, operating as a result of inherited epigenetic changes (19–22). Yet no  
51 genetic validation of this assumption has been carried out, and it remains possible that a simpler  
52 intergenerational pathway explains such results. Specifically, early adversity experienced by a  
53 parent may act as a classic parental effect by changing the parent's phenotype, which in turn  
54 influences the offspring's phenotype (23–26).

55         The best evidence for intergenerational effects of early adversity comes from several  
56 laboratory studies of short-lived animals, which find strong relationships between a female's  
57 early life environment and the body size of her offspring [(27–36), reviewed in (37), but see (38)]

58 for a rare example in wild house wrens]. These findings provide important proof-of-principle that  
59 intergenerational effects of early adversity can occur. However, these studies do not address  
60 whether intergenerational effects of early adversity occur in natural populations of long-lived  
61 animals. And while a few studies of captive animals have demonstrated a relationship between a  
62 female's early environment and her offspring's survival or reproduction (39–41), the ecological  
63 validity of these findings has yet to be verified by studying intergenerational fitness effects in a  
64 population of wild and/or long-lived animals. By working in a natural population, we are able to  
65 guarantee that animals are exposed only to natural levels of early adversity, and are also subject  
66 to any social factors which might mitigate or aggravate the influence of those early adverse  
67 events.

68 Addressing whether the effects of early adversity in one generation affect reproduction or  
69 survival in the next is challenging because of the difficulties of linking high-quality data on early  
70 adversity in one generation to health and survival outcomes in the next. Here, we overcome these  
71 challenges by taking advantage of a prospective longitudinal dataset from a natural primate  
72 population: the baboons of the Amboseli ecosystem in southern Kenya (42). This dataset  
73 includes 45 years of individual-based data on early adversity, and real-time observations of later-  
74 life survival outcomes for hundreds of subjects with known maternities and grand maternities.  
75 Moreover, unlike many human populations, we do not observe inter-generational transmission of  
76 adverse conditions; that is, offspring of females who experienced early life adversity are not  
77 more likely to experience early life adversity themselves—allowing us to avoid this common  
78 confound in human societies.

79 To test for intergenerational effects of early adversity, we focused on early adversity  
80 experienced by female baboons who later became mothers, and whose offspring were also in our

81 data set. We asked whether the early adversity experienced by these females (“maternal early  
82 adversity”) predicted the survival of their juvenile offspring in the next generation, after  
83 controlling for the early adversity directly experienced by the offspring themselves.

84 We considered five types of early adverse conditions (Table 1), based on previous work  
85 in our study population that demonstrated effects of these conditions on a female baboon’s own  
86 adult survival (18). These included: (i) maternal death during development (0-4 years of age),  
87 which indicates the loss of an important source of social support, physical protection, and  
88 nutrition (43, 44), (ii) being born to a low-ranking mother, which influences growth rates and age  
89 at maturation (45–47) (iii) being born into a large social group (and thus experiencing high  
90 density conditions and high levels of within-group competition) (11, 45, 48) (iv) being born  
91 during a drought, which reduces fertility in adulthood (11, 49), and (v) experiencing the birth of  
92 a close-in-age younger sibling, which may reduce maternal investment received during  
93 development (50). Importantly—and in contrast to human studies (51)—sources of early  
94 adversity are not strongly correlated in our population (Table S1).

## 95 **Results**

96 We built a mixed effects Cox proportional hazards model of offspring survival during the  
97 juvenile period that included early adversity measures present in the mother’s and the offspring’s  
98 early life as binary fixed effects. We defined the juvenile period based on survival until age 4,  
99 near the age of menarche for females and earliest dispersal for males in this population (52). We  
100 included data on maternal early adversity for all five adverse early life conditions, and we  
101 included data on offspring early adversity for four of the five conditions. We excluded the birth  
102 of a close-in-age younger sibling for the offspring generation because the survival of the focal  
103 offspring strongly affects the length of the subsequent birth interval (i.e., offspring that die

104 shortly after birth also have the closest-in-age younger siblings). We included maternal and  
105 grandmaternal ID as random effects. In total, we used data collected from 1973-2017 to analyze  
106 the survival of 687 offspring (46.5% males) born to 169 females (mean 4.1 offspring per female,  
107 range 1-12) for whom we had data on all five adverse conditions in the mother's early life, and  
108 all four adverse conditions in the offspring's early life.

109 Each adverse condition was scored as present or absent for each subject, and each one  
110 affected a minority of our study subjects (range 6%-34%). Mothers and offspring had similar  
111 chances of experiencing adverse conditions, except for social density: offspring were more likely  
112 than mothers to be born into large social groups because of population growth over the 5-decade  
113 study period (Table 1). Unlike typical patterns of early adversity in human populations (51),  
114 sources of early life adversity in our population were not strongly correlated: with the exception  
115 of maternal rank in the mother's and offspring's generations ( $p < 0.0001$ ,  $r = 0.40$ ), no adverse  
116 condition explained more than 4% of the variance in any other condition, either within or  
117 between generations (Table S1).

118 *Maternal Early Life Adversity and Offspring Survival:* Our full multivariate Cox  
119 proportional hazards model for offspring survival (Table S2) included all 9 early adverse  
120 conditions (five for mothers and four for offspring). We found strong negative effects of two  
121 characteristics of the *mother's* early life environment on their offspring's survival during the first  
122 4 years of life: maternal loss (hazard ratio = 1.48,  $p = 0.006$ ) and presence of a close-in-age  
123 younger sibling (HR = 1.39,  $p = 0.03$ ). Following backwards model selection, these two  
124 characteristics remained the only significant maternal early life predictors of offspring survival  
125 (Table 2, Figure 1, along with two conditions in the offspring's early life environment: see  
126 below). Specifically, offspring whose mothers experienced early maternal loss experienced a

127 48% higher probability of dying throughout the first four years of life than unaffected offspring,  
128 and offspring whose mothers had a close-in-age sibling experienced a 39% higher probability of  
129 dying than unaffected offspring. This effect is striking especially considering that a median of  
130 7.0 and 8.0 years separated the offspring's own birth from the mother's experience of maternal  
131 loss or birth of a close-in-age sibling, respectively. Notably, previous work in our population  
132 found that these two sources of adversity—maternal loss and the presence of a close-in-age  
133 younger sibling during early life—are also sources of mortality risk once females reach  
134 adulthood, and in fact are the two strongest predictors of adult survival among six different early-  
135 life conditions considered (18). Hence, early-life conditions that are especially adverse for  
136 females when they reach adulthood also negatively affect the survival of their offspring.

137 Both the full and reduced models of offspring survival also included two conditions in the  
138 *offspring's* early life environment as significant predictors of juvenile survival. Specifically,  
139 maternal loss experienced by the offspring and low maternal rank during the offspring's juvenile  
140 period had strong negative effects on offspring survival (Table 2, maternal death: HR = 1.95,  
141  $p=5 \times 10^{-7}$ , low maternal rank: HR=1.43,  $p=0.025$ ). Thus, maternal loss in the offspring's  
142 generation had a stronger effect on offspring survival (nearly doubling offspring mortality risk)  
143 than maternal loss in the mother's generation. In contrast, the effect of having a low-ranking  
144 mother, which was associated with a 43% increase in offspring mortality risk, was comparable in  
145 its effect size to the two significant predictors from the maternal generation (maternal loss and  
146 close-in-age sibling for the mother, 48% and 39% increase in offspring mortality, respectively).  
147 Thus, two adverse conditions in a mother's early life had as large or larger of an impact on her  
148 offspring's survival than all but one adverse condition experienced by the offspring directly.

149            *Maternal Viability and Offspring Survival:* The strong effect of the mother's death on the  
150 survival of offspring to age four years (Table 2) could arise if offspring die *after* their mothers  
151 die: even after weaning (approximately 1.5 years of age), juvenile baboons rely on their mothers  
152 for social support and social learning (53). Alternatively, these offspring may die *before* their  
153 mothers die if those mothers are themselves in poor condition. To distinguish these alternatives,  
154 we modeled offspring survival to age 2 years (halfway through the juvenile period) as a function  
155 of maternal death during years 2-4 after an offspring's birth (i.e., the two years that *followed* the  
156 offspring survival period modeled in the response variable). In this analysis we considered only  
157 the subset of offspring in our dataset whose mothers survived the entirety of the first two years of  
158 the offspring's life, and for whom we were able to evaluate the four significant predictors of  
159 offspring survival identified above and in Table 2 (N=671). Our results showed that offspring  
160 were less likely to survive during the first two years of life if they were born to mothers who died  
161 2-4 years after their birth. In other words, these offspring were more likely to die even when their  
162 mother was still alive (hazard ratio=1.50 [1.01-2.23], p=0.045).

163            To test whether this link between offspring survival and maternal viability was driven by  
164 maternal early adversity, we next partitioned our analysis of offspring survival to age 2 based on  
165 whether the mother experienced either maternal loss or a close-in-age younger sibling (i.e., either  
166 or both of the two maternal early life conditions that significantly predicted their offspring's  
167 survival; Table 2). We found that, among offspring whose mothers experienced either or both of  
168 these two conditions (N=247), maternal death in years 2-4 after the offspring's birth significantly  
169 predicted reduced offspring survival to age 2 years (Figure 2a, hazards ratio=1.78, 95% CI =  
170 [1.05-3.01], p=0.03). Maternal death in the same period did not, however, predict reduced  
171 offspring survival when mothers had not experienced maternal loss or a close-in-age younger



172 sibling (N=424; Figure 2b, hazard ratio=1.21, 95% CI = [0.7-2.2], p=0.53). This finding is  
173 consistent with the hypothesis that maternal early life adversity results in low maternal viability  
174 in adulthood, which in turn results in both earlier death for adult females and a reduction in their  
175 ability to successfully raise offspring towards the end of their lives.

176 *Maternal Early Life Adversity and Quantity of Maternal Care:* We hypothesized that  
177 developmental constraints imposed on females by early life adversity could lead to reduced  
178 survival in their offspring as a result of two non-mutually exclusive mechanisms. First, mothers  
179 that experienced early life adversity might provide lower levels of maternal care to their  
180 offspring than other mothers, through differences in either maternal behavior or physiology (e.g.  
181 reduced nutrient content in milk). Second, females who experienced early adversity might also  
182 exhibit reduced egg and/or amniotic environmental quality (an established mechanism for  
183 transmission of maternal effects (37, 54)). We were able to partially test the first hypothesis by  
184 drawing on longitudinal behavioral data for this population. Specifically, we built linear mixed  
185 effects models to test whether maternal early adversity affected the proportion of time during 10-  
186 minute focal follows that a mother spent either carrying or suckling her dependent infants. Fixed  
187 effects in the model included maternal viability (a binary variable indicating whether the mother  
188 survived for four years after offspring birth), the two early adverse circumstances experienced by  
189 the mother that affected offspring survival (the mother's maternal loss and close-in-age sibling),  
190 offspring age (both as a linear and as a quadratic term), maternal rank, maternal age, the number  
191 of adult females in the social group, and season. We also included maternal ID, offspring ID,  
192 group ID, and observer ID as random effects.

193 Neither maternal viability nor either of the two maternal early adversity effects was a  
194 significant predictor of the proportion of time that mothers spent carrying or suckling their

195 infants in either full multivariate models or models resulting from backwards selection ( $p > 0.1$  in  
196 all cases, Tables S3-S6). However, the proportion of time that mothers spend carrying and  
197 suckling offspring are relatively coarse metrics of maternal care, and it could be that more fine-  
198 grained measures of maternal care (which we do not regularly collect) could reveal a relationship  
199 between maternal early adversity and future maternal care.

200

## 201 **Discussion**

202         We have demonstrated that adverse environmental conditions during the early life of a  
203 female baboon, which are already known to negatively affect both her survival (18) and her  
204 reproduction (11) in adulthood, also reduce the survival of her offspring. Importantly, this effect  
205 is independent of the environment experienced by those offspring themselves (Figure 1). The  
206 reduction in offspring survival is likely linked to reductions in maternal viability: mothers that  
207 experienced early life adversity are significantly less able to successfully raise offspring born  
208 near the ends of their lives, while the same is not true for mothers that did not experience early  
209 life adversity (Figure 2). Together, these findings support the hypothesis that early life adversity  
210 produces constraints during development that lead not only to reduced adult survival and lifetime  
211 reproductive success (18) but also to a reduced ability to successfully raise those offspring that  
212 are produced.

213         The results reported here help to fill a key gap in the literature concerning the  
214 intergenerational effects of early life adversity on survival. Results from human studies have  
215 yielded inconsistent results on this topic thus far: different studies on the same populations have  
216 reported contradictory sex-specific effects on health (19, 20) or have found that small differences  
217 in the age at which probands' parents or grandparents were exposed to adversity can lead to a

218 reversal in the direction of these effects (21, 22). Among studies in non-human animals, several  
219 studies in fish (55, 56), reptiles (57), birds (58, 59), and ungulates (60–64) have found that  
220 parental body condition at the time of offspring birth influences offspring survival, but none have  
221 linked parents' early adverse experiences to offspring survival. Additionally, while previous  
222 studies have identified effects of parental early adversity on offspring traits in a limited number  
223 of systems (37, 39, 40), ours is the first to link parental early adversity to offspring fitness  
224 outcomes in a wild, long-lived animal.

225         Our findings help to explain the persistence of health deficits across generations (65–67),  
226 by revealing that in long-lived primates, the early life experiences of mothers have important  
227 implications for offspring health and survival. Recent studies in humans have demonstrated that  
228 conditions experienced by mothers during pregnancy (e.g., low SES, psychosocial stress, mood  
229 dysregulation, prenatal smoking) can affect HPA axis regulation (68, 69) and birthweight (65,  
230 66) in her offspring. These and other maternal characteristics present during pregnancy are  
231 influenced not only by mothers' experiences in adulthood, but also by the long-term effects of  
232 environmental conditions experienced in mothers' early lives (54, 66). Our findings therefore  
233 motivate future work to test for comparable intergenerational fitness effects of early adversity in  
234 humans and other non-human animals.

235         Our findings are consistent with the hypothesis that early adversity results in  
236 intergenerational effects of developmental constraints (11, 70–72) and are not consistent with an  
237 intergenerational predictive adaptive response hypothesis (71, 73, 74). Rather than being  
238 buffered against the effects of maternal loss, those offspring that experienced maternal loss and  
239 whose mothers had also experienced maternal loss were more likely, not less likely, to die, as  
240 compared to offspring that experienced maternal loss but whose mothers did not. Thus, offspring

241 experience constraints not only as a result of their own early environment, but also as a result of  
242 their mother's developmental history, including events that occurred years before the offspring's  
243 own conception. Our results are consistent with the hypothesis that a female's condition at the  
244 time of her offspring's conception and/or birth reflects her previous experiences, and that her  
245 condition thereby influences the development and survival of her offspring (54, 75, 76).

246 Finally, our study provides insight into how the effects of early adversity may be  
247 transmitted from parent to offspring. Intergenerational transmission of adversity has often been  
248 viewed as a potential transgenerational effect – i.e., environmental exposures in one generation  
249 that directly alter the biology of animals born at least one generation later, perhaps via the  
250 inheritance of environmentally-induced epigenetic changes (77). While we cannot exclude this  
251 possibility, our results suggest that a simpler mechanism may be operating. The intergenerational  
252 effects of early adversity on offspring survival that we present here are consistent with a classic  
253 parental effect (19-22) in which early life adversity affects the phenotypic quality of the mother  
254 during adulthood, and her resulting deficits directly affect her offspring's development. This  
255 mode of transmission – in which intergenerational transmission of parental early adversity  
256 operates via differences in parental phenotype, rather than via transgenerational effects that  
257 determine offspring phenotypes – may be more widespread than is typically thought (78). This  
258 insight may have important implications for understanding the persistence of human health  
259 deficits across generations and inform the approaches taken to intervene in this transmission  
260 (79).

261

262 **Methods**

263        *Study system:* The Amboseli Baboon Research Project is a long-term longitudinal study of  
264 wild baboons living in and around Amboseli National Park, Kenya. A detailed description of the  
265 study system can be found elsewhere (42). Researchers have continuously collected behavioral,  
266 environmental, and demographic data from the population since 1971. All subjects are visually  
267 recognized, and near-daily censuses allow us to precisely document the timing of demographic  
268 events, including the birth and death of study individuals. Critical to this study, we have  
269 continuously collected near-daily measures of group size, daily rainfall levels, and monthly  
270 calculations of social dominance rank (80), and we can accurately assign the dates of birth of all  
271 mothers and offspring born into study groups as well as the dates of all juvenile and adult female  
272 deaths.

273        *Study Subjects:* In our analyses of offspring survival, we included individuals who met two  
274 criteria: (i) we were able to evaluate each of the five sources of maternal early life adversity and  
275 four sources of offspring early life adversity outlined below; and (ii) they lived in social groups  
276 that fed exclusively on wild foods rather than having their diet supplemented with human-  
277 sourced refuse. Although transmission of paternal early adversity may also occur in our  
278 population, we did not consider it here because we knew paternal identities for only a subset of  
279 our study subjects and had early life data on only a limited number of fathers. Our analysis  
280 ultimately relied on data spanning more than four decades, from 1973 to 2017.

281        *Measuring Early Life Adversity:* Previous work in the Amboseli population defined six  
282 binary indicators of early life adversity and considered a single index of cumulative adversity  
283 based on the sum of these indicators (18). This cumulative adversity index is a strong predictor  
284 of adult lifespan: females that experienced high levels of early life adversity (i.e., a greater  
285 number of adverse early life conditions) but still survived to adulthood lived dramatically shorter

286 lives compared to females that did not experience adversity (18). In addition to the five sources  
287 of early adversity discussed above, this previous analysis also considered early social  
288 connectedness (social integration versus social isolation) as a sixth source of adversity (18).  
289 Social connectedness data are missing for some mothers who were born relatively early in the  
290 long-term study. To maximize our sample size, we therefore did not include measures of social  
291 connectedness in this analysis. Our operational definitions for each source of adversity mirrored  
292 those used by Tung *et al* (18) for the remaining five conditions, except that here we employed  
293 measures of proportional rather than ordinal dominance rank (i.e., rank measured as a proportion  
294 of females that the focal individual dominates, rather than her ordinal rank number). We also  
295 built an index of cumulative maternal adversity, but because that model did not fit the data better  
296 than our reduced multivariate model (in contrast to the results for adult female survival (18)) we  
297 report the multivariate model in the main text. The alternative model based on cumulative  
298 maternal adversity is presented in Table S7.

299 *Statistical Analysis:* We built a mixed effects Cox proportional hazards model of offspring  
300 survival during the first four years of life using the R package *coxme* (81, 82). The response  
301 variable in our model was the age at which offspring death occurred (if at all) during the first 4  
302 years of life. We considered offspring survival to age 4 as the key survival period of interest  
303 because it roughly corresponds to the end of the juvenile period for baboons (52). Offspring that  
304 survived beyond age 4 were treated as censored individuals who survived until at least age 4. In  
305 our models of offspring survival as a function of maternal viability (Figure 2), we altered the first  
306 model to predict survival during the first two years of life as a function of maternal survival  
307 during years 2-4 after offspring birth. To test for effects of maternal adversity on the quantity of

308 maternal care we built linear mixed effects models using the R package lme4 (83) (see Table S8  
309 for model syntax).

310

### 311 **References:**

- 312 1. Uller T, Nakagawa S, English S (2013) Weak evidence for anticipatory parental effects in  
313 plants and animals. *J Evol Biol* 26(10):2161–2170.
- 314 2. Naess Ø, Claussen B, Davey Smith G (2004) Relative impact of childhood and adulthood  
315 socioeconomic conditions on cause specific mortality in men. *J Epidemiol Community*  
316 *Health* 58(7):597–8.
- 317 3. Beebe-Dimmer J, et al. (2004) Childhood and Adult Socioeconomic Conditions and 31-  
318 Year Mortality Risk in Women. *Am J Epidemiol* 159(5):481–490.
- 319 4. Kittleson MM, et al. (2006) Association of Childhood Socioeconomic Status With  
320 Subsequent Coronary Heart Disease in Physicians. *Arch Intern Med* 166(21):2356.
- 321 5. Davey Smith G, Hart C, Blane D, Hole D (1998) Adverse socioeconomic conditions in  
322 childhood and cause specific adult mortality: prospective observational study. *BMJ*  
323 316(7145):1631–5.
- 324 6. Frankel S, Smith GD, Gunnell D (1999) Childhood Socioeconomic Position and Adult  
325 Cardiovascular Mortality: The Boyd Orr Cohort. *Am J Epidemiol* 150(10):1081–1084.
- 326 7. Lidfeldt J, Li TY, Hu FB, Manson JE, Kawachi I (2007) A Prospective Study of  
327 Childhood and Adult Socioeconomic Status and Incidence of Type 2 Diabetes in Women.  
328 *Am J Epidemiol* 165(8):882–889.
- 329 8. Van De Mheen H, Stronks K, Looman C, Mackenbach J (1998) Does childhood  
330 socioeconomic status influence adult health through behavioural factors? *C Int*  
331 *Epidemiological Assoc Gt Britain Int J of Epidemiology* 27:431–137.
- 332 9. Kuh D, Hardy R, Langenberg C, Richards M, Wadsworth MEJ (2002) Mortality in adults  
333 aged 26–54 years related to socioeconomic conditions in childhood and adulthood: post  
334 war birth cohort study. *BMJ* 325(7372):1076–80.
- 335 10. Galobardes B, Lynch JW, Davey Smith G (2004) Childhood Socioeconomic  
336 Circumstances and Cause-specific Mortality in Adulthood: Systematic Review and  
337 Interpretation. *Epidemiol Rev* 26(1):7–21.
- 338 11. Lea AJ, Altmann J, Alberts SC, Tung J (2015) Developmental Constraints in a Wild  
339 Primate. *Source Am Nat* 185178111(6):809–821.
- 340 12. Douhard M, et al. (2014) Fitness consequences of environmental conditions at different  
341 life stages in a long-lived vertebrate. *Proceedings Biol Sci* 281(1785):20140276.
- 342 13. Nussey DH, Kruuk LEB, Morris A, Clutton-Brock TH (2007) Environmental conditions  
343 in early life influence ageing rates in a wild population of red deer. *Curr Biol*  
344 17(23):R1000–R1001.
- 345 14. Pigeon G, Pelletier F (2018) Direct and indirect effects of early-life environment on  
346 lifetime fitness of bighorn ewes. *Proceedings Biol Sci* 285(1870):20171935.
- 347 15. Herfindal I, van de Pol M, Nielsen JT, Saether B-E, Møller AP (2015) Climatic conditions  
348 cause complex patterns of covariation between demographic traits in a long-lived raptor. *J*  
349 *Anim Ecol* 84(3):702–711.

- 350 16. Balbontín J, Møller AP (2015) Environmental conditions during early life accelerate the  
351 rate of senescence in a short-lived passerine bird. *Ecology* 96(4):948–959.
- 352 17. Millon A, Petty SJ, Little B, Lambin X (2011) Natal conditions alter age-specific  
353 reproduction but not survival or senescence in a long-lived bird of prey. *J Anim Ecol*  
354 80(5):968–975.
- 355 18. Tung J, Archie EA, Altmann J, Alberts SC (2016) Cumulative early life adversity predicts  
356 longevity in wild baboons. *Nat Commun* 7:11181.
- 357 19. Veenendaal M, et al. (2013) Transgenerational effects of prenatal exposure to the 1944–45  
358 Dutch famine. *BJOG An Int J Obstet Gynaecol* 120(5):548–554.
- 359 20. Painter R, et al. (2008) Transgenerational effects of prenatal exposure to the Dutch famine  
360 on neonatal adiposity and health in later life. *BJOG An Int J Obstet Gynaecol*  
361 115(10):1243–1249.
- 362 21. Kaati G, Bygren LO, Pembrey M, Sjöström M (2007) Transgenerational response to  
363 nutrition, early life circumstances and longevity. *Eur J Hum Genet* 15(7):784–790.
- 364 22. Pembrey ME, et al. (2006) Sex-specific, male-line transgenerational responses in humans.  
365 *Eur J Hum Genet* 14(2):159–166.
- 366 23. Mousseau T, Fox C eds. (1998) *Maternal effects as adaptations* (Oxford University  
367 Press).
- 368 24. Mousseau TA, Fox CW (1998) The adaptive significance of maternal effects. *Trends Ecol*  
369 *Evol* 13(10):403–407.
- 370 25. Russell AF, Lummaa V (2009) Maternal effects in cooperative breeders: from  
371 hymenopterans to humans. *Philos Trans R Soc B Biol Sci* 364(1520):1143–1167.
- 372 26. Badyaev A V, Uller T (2009) Parental effects in ecology and evolution: mechanisms,  
373 processes and implications. *Philos Trans R Soc Lond B Biol Sci* 364(1520):1169–77.
- 374 27. William Huck U, Labov JB, Lisk RD (1986) Food Restricting Young Hamsters  
375 (*Mesocricetus Auratus*) Affects Sex Ratio and Growth of Subsequent Offspring1. *Biol*  
376 *Reprod* 35(3):592–598.
- 377 28. Alonso-Alvarez C, Bertrand S, Sorci G (2007) Sex-specific transgenerational effects of  
378 early developmental conditions in a passerine. *Biol J Linn Soc* 91(3):469–474.
- 379 29. Helle H, Koskela E, Mappes T (2012) Life in varying environments: experimental  
380 evidence for delayed effects of juvenile environment on adult life history. *J Anim Ecol*  
381 81(3):573–582.
- 382 30. Goerlich VC, Nätt D, Elfving M, Macdonald B, Jensen P (2012) Transgenerational  
383 effects of early experience on behavioral, hormonal and gene expression responses to  
384 acute stress in the precocial chicken. *Horm Behav* 61:711–718.
- 385 31. Taborsky B (2006) Mothers determine offspring size in response to own juvenile growth  
386 conditions. *Biol Lett* 2(2):225–8.
- 387 32. Beckerman AP, Benton TG, Lapsley CT, Koesters N (2003) Talkin’ ’bout my generation:  
388 environmental variability and cohort effects. *Am Nat* 162(6):754–67.
- 389 33. Saastamoinen M, Hirai N, van Nouhuys S (2013) Direct and trans-generational responses  
390 to food deprivation during development in the Glanville fritillary butterfly. *Oecologia*  
391 171(1):93–104.
- 392 34. Vijendravarma RK, Narasimha S, Kawecki TJ (2010) Effects of parental larval diet on  
393 egg size and offspring traits in *Drosophila*. *Biol Lett* 6(2):238–41.
- 394 35. Fischer K, Eenhoorn E, Bot ANM, Brakefield PM, Zwaan BJ (2003) Cooler butterflies lay  
395 larger eggs: developmental plasticity versus acclimation. *Proceedings Biol Sci*



- 396 270(1528):2051–6.
- 397 36. Jobson MA, et al. (2015) Transgenerational Effects of Early Life Starvation on Growth,  
398 Reproduction, and Stress Resistance in *Caenorhabditis elegans*. *Genetics* 201(1):201–12.
- 399 37. Burton T, Metcalfe NB (2014) Can environmental conditions experienced in early life  
400 influence future generations? *Proceedings Biol Sci* 281(1785):20140311.
- 401 38. Bowers EK, Thompson CF, Sakaluk SK (2017) Maternal Natal Environment and  
402 Breeding Territory Predict the Condition and Sex Ratio of Offspring. *Evol Biol* 44(1):11–  
403 20.
- 404 39. William Huck U, Labov JB, Lisk RD (1987) Food-Restricting First Generation Juvenile  
405 Female Hamsters (*Mesocricetus Auratus*) Affects Sex Ratio and Growth of Third  
406 Generation Offspring1. *Biol Reprod* 37(3):612–617.
- 407 40. Naguib M, Nemitz A, Gil D (2006) Maternal developmental stress reduces reproductive  
408 success of female offspring in zebra finches. *Proceedings Biol Sci* 273(1596):1901–5.
- 409 41. Marcil-ferland D, Festa-bianchet M, Martin AM, Pelletier F (2013) Despite Catch-Up ,  
410 Prolonged Growth Has Detrimental Fitness Consequences in a Long-Lived Vertebrate.  
411 *Am Nat* 182(6):775–782.
- 412 42. Alberts SC, Altmann J (2012) The Amboseli baboon research project: 40 years of  
413 continuity and change. *Long-Term Field Studies of Primates*, pp 261–287.
- 414 43. Altmann J (1980) *Baboon Mothers and Infants* (Harvard University Press, Cambridge,  
415 Massachusetts).
- 416 44. Lea AJ, Learn NH, Theus MJ, Altmann J, Alberts SC (2014) Complex sources of variance  
417 in female dominance rank in a nepotistic society. *Anim Behav* 94:87–99.
- 418 45. Charpentier MJE, Tung J, Altmann J, Alberts SC (2008) Age at maturity in wild baboons:  
419 genetic, environmental and demographic influences. *Mol Ecol* 17:2026–2040.
- 420 46. Altmann J, Alberts SC (2003) Intraspecific Variability in Fertility and Offspring Survival  
421 in a Nonhuman Primate: Behavioral Control of Ecological and Social Sources. *Offspring:  
422 The Biodemography of Fertility and Family Behavior*, eds Wachter K.W., Bulatao R.A  
423 (National Academy Press, Washington, D.C.). Available at:  
424 <https://amboselibaboons.nd.edu/assets/81618/162.pdf> [Accessed February 27, 2018].
- 425 47. Altmann J, Hausfater G, Altmann SA (1988) Determinants of Reproductive Success in  
426 Savannah Baboons, *Papio cynocephalus*. *Reproductive Success*, ed Clutton-Brock TH  
427 (University of Chicago Press, Chicago). Available at:  
428 [https://amboselibaboons.nd.edu/assets/219836/determinants\\_of\\_reproductive\\_success\\_in\\_  
429 savannah\\_baboons\\_papio\\_cynocephalus.pdf](https://amboselibaboons.nd.edu/assets/219836/determinants_of_reproductive_success_in_savannah_baboons_papio_cynocephalus.pdf) [Accessed February 27, 2018].
- 430 48. Altmann J, Alberts SC (2003) Variability in reproductive success viewed from a life-  
431 history perspective in baboons. *Am J Hum Biol* 15(3):401–409.
- 432 49. Beehner JC, Onderdonk DA, Alberts SC, Altmann J (2006) The ecology of conception  
433 and pregnancy failure in wild baboons. *Behav Ecol* 17:741–750.
- 434 50. Altmann J, Altmann SA, Hausfater G, Gould JL (2015) Primate Infant ’ s Effects on  
435 Mother ’ s Future Reproduction Linked references are available on JSTOR for this article :  
436 Primate Infant ’ s Effects on Mother ’ s Future Reproduction. 201(4360):1028–1030.
- 437 51. Felitti VJ, et al. (1998) Relationship of Childhood Abuse and Household Dysfunction to  
438 Many of the Leading Causes of Death in Adults: The Adverse Childhood Experiences  
439 (ACE) Study. *Am J Prev Med* 14(4):245–258.
- 440 52. Charpentier MJE, Tung J, Altmann J, Alberts SC (2008) Age at maturity in wild baboons:  
441 Genetic, environmental and demographic influences. *Mol Ecol* 17(8):2026–2040.

- 442 53. van Noordwijk MA (2012) From maternal investment to lifetime maternal care. *The*  
443 *Evolution of Primate Societies*, eds Mitani JC, Call J, Kappeler PM, Palombit RA, Silk JB  
444 (University of Chicago Press, Chicago, Illinois).
- 445 54. Kuzawa CW (2005) Fetal origins of developmental plasticity: Are fetal cues reliable  
446 predictors of future nutritional environments? *Am J Hum Biol* 17(1):5–21.
- 447 55. Donelson JM, McCormick MI, Munday PL (2008) Parental condition affects early life-  
448 history of a coral reef fish. *J Exp Mar Bio Ecol* 360(2):109–116.
- 449 56. Venturelli PA, et al. (2010) Maternal influences on population dynamics: evidence from  
450 an exploited freshwater fish. *Ecology* 91(7):2003–2012.
- 451 57. Warner DA, Lovern MB (2014) The Maternal Environment Affects Offspring Viability  
452 via an Indirect Effect of Yolk Investment on Offspring Size. *Physiol Biochem Zool*  
453 87(2):276–287.
- 454 58. Blomqvist D, Johansson OC, Götmark F (1997) Parental quality and egg size affect chick  
455 survival in a precocial bird, the lapwing *Vanellus vanellus*. *Oecologia* 110(1):18–24.
- 456 59. RIDLEY AR (2007) Factors affecting offspring survival and development in a  
457 cooperative bird: social, maternal and environmental effects. *J Anim Ecol* 76(4):750–760.
- 458 60. Cameron RD, Smith WT, Fancy SG, Gerhart A N D Robert G White KL (1987) Calving  
459 success of female caribou in relation to body weight. Available at:  
460 <http://www.nrcresearchpress.com/doi/pdf/10.1139/z93-069> [Accessed February 26, 2018].
- 461 61. Théoret-Gosselin R, Hamel S, Côté SD (2015) The role of maternal behavior and  
462 offspring development in the survival of mountain goat kids. *Oecologia* 178(1):175–186.
- 463 62. Keech MA, et al. (2000) Life-History Consequences of Maternal Condition in Alaskan  
464 Moose. *J Wildl Manage* 64(2):450.
- 465 63. Clutton-Brock TH, Major M, Albon SD, Guinness FE (1987) Early Development and  
466 Population Dynamics in Red Deer. I. Density-Dependent Effects on. *Source J Anim Ecol J*  
467 *Anim Ecol* 56(1):53–67.
- 468 64. Clutton-Brock TH, Albon SD, Guinness FE (1984) Maternal dominance, breeding success  
469 and birth sex ratios in red deer. *Nature* 308(5957):358–360.
- 470 65. Aizer A, Currie J (2014) The intergenerational transmission of inequality: maternal  
471 disadvantage and health at birth. *Science* 344(6186):856–61.
- 472 66. Kane JB, Harris KM, Siega-Riz AM (2018) Intergenerational pathways linking maternal  
473 early life adversity to offspring birthweight. *Soc Sci Med* 207:89–96.
- 474 67. Cnattingius S, Villamor E, Lagerros YT, Wikström A-K, Granath F (2012) High birth  
475 weight and obesity—a vicious circle across generations. *Int J Obes* 36(10):1320–1324.
- 476 68. Thayer ZM, Kuzawa CW (2014) Early origins of health disparities: Material deprivation  
477 predicts maternal evening cortisol in pregnancy and offspring cortisol reactivity in the first  
478 few weeks of life. *Am J Hum Biol* 26(6):723–730.
- 479 69. Entringer S, Kumsta R, Hellhammer DH, Wadhwa PD, Wüst S (2009) Prenatal exposure  
480 to maternal psychosocial stress and HPA axis regulation in young adults. *Horm Behav*  
481 55(2):292–298.
- 482 70. Grafen A (1988) On the uses of data on lifetime reproductive success. *Reproductive*  
483 *Success*, ed Clutton-brock TH (University of Chicago Press, Chicago, IL).
- 484 71. Monaghan P (2007) Early growth conditions, phenotypic development and environmental  
485 change. *Philos Trans R Soc B Biol Sci* 363(1497):1635–1645.
- 486 72. Lea AJ, Tung J, Archie EA, Alberts SC (2017) Developmental plasticity: bridging  
487 research in evolution and human health. *Evol Med Public Heal* 2017(1):162–175.

- 488 73. Gluckman PD, Hanson MA, Spencer HG (2005) Predictive adaptive responses and human  
489 evolution. *Trends Ecol Evol* 20(10):527–533.
- 490 74. Herman JJ, Spencer HG, Donohue K, Sultan SE (2014) How stable “should” epigenetic  
491 modifications be? Insights from adaptive plasticity and bet hedging. *Evolution (N Y)*  
492 68(3):632–643.
- 493 75. Kuzawa CW (2017) Which environments matter in studies of early life developmental  
494 plasticity? *Evol Med Public Heal* 2017(1):188–190.
- 495 76. Lea AJ, Tung J, Archie EA, Alberts SC, Kenya of (2018) Developmental plasticity  
496 research in evolution and human health Response to commentaries. *Evolution (N Y)*:201–  
497 205.
- 498 77. Heard E, Martienssen RA (2014) Transgenerational Epigenetic Inheritance: Myths and  
499 Mechanisms. *Cell* 157(1):95–109.
- 500 78. Drake A, Walker B (2004) The intergenerational effects of fetal programming: non-  
501 genomic mechanisms for the inheritance of low birth weight and cardiovascular risk. *J*  
502 *Endocrinol* 180. Available at:  
503 <https://joe.bioscientifica.com/abstract/journals/joe/180/1/1.xml> [Accessed March 11,  
504 2019].
- 505 79. Godfrey K, Gluckman P, Hanson M (2010) Developmental origins of metabolic disease:  
506 life course and intergenerational perspectives. *Trends Endocrinol Metab* 21. Available at:  
507 [https://ac.els-cdn.com/S1043276009002197/1-s2.0-S1043276009002197-](https://ac.els-cdn.com/S1043276009002197/1-s2.0-S1043276009002197-main.pdf?_tid=e9b743c6-ff83-42f3-af31-5952fbc576c9&acdnat=1552315902_02b505e3a3df2b73ea473967441f4523)  
508 [main.pdf?\\_tid=e9b743c6-ff83-42f3-af31-](https://ac.els-cdn.com/S1043276009002197/1-s2.0-S1043276009002197-main.pdf?_tid=e9b743c6-ff83-42f3-af31-5952fbc576c9&acdnat=1552315902_02b505e3a3df2b73ea473967441f4523)  
509 [5952fbc576c9&acdnat=1552315902\\_02b505e3a3df2b73ea473967441f4523](https://ac.els-cdn.com/S1043276009002197/1-s2.0-S1043276009002197-main.pdf?_tid=e9b743c6-ff83-42f3-af31-5952fbc576c9&acdnat=1552315902_02b505e3a3df2b73ea473967441f4523) [Accessed  
510 March 11, 2019].
- 511 80. Hausfater G (1975) Dominance and reproduction in Baboons (*Papio cynocephalus*).  
512 *Contrib Primatol* 7:1–150.
- 513 81. Therneau TM (2012) coxme: Mixed Effects Cox Models, R Package Version 2.3-3.
- 514 82. R\_Core\_Team (2013) R: A language and environment for statistical computing.
- 515 83. Bates D, Maechler M, Bolker B, Walker S (2014) lme4: Linear mixed-effects models  
516 using Eigen and S4.
- 517 84. Silk JB, Alberts SC, Altmann J (2003) Social Bonds of Female Baboons Enhance Infant  
518 Survival. *Source Sci New Ser* 302(5648):1231–1234.  
519  
520

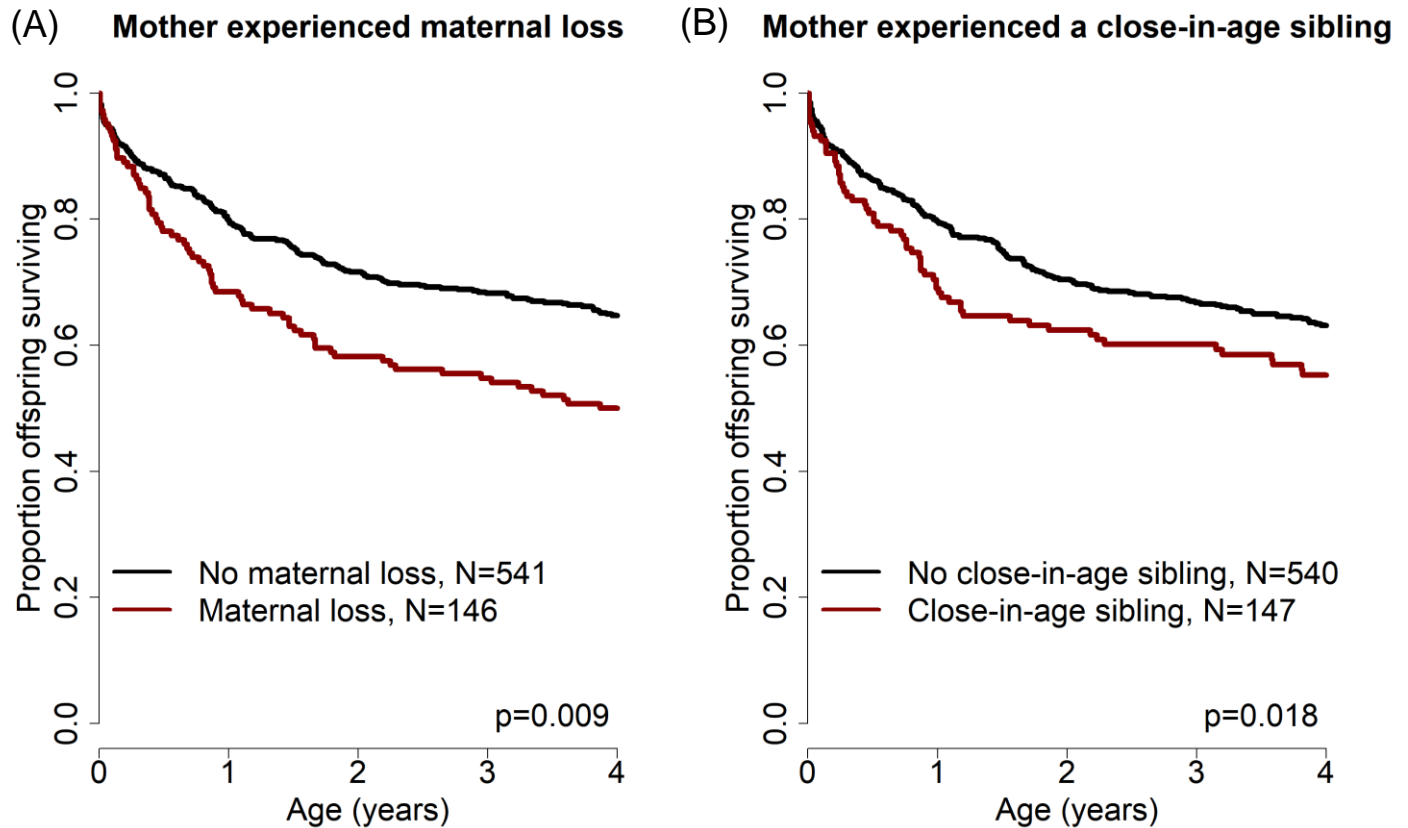

1 **Figure 1. Offspring survival was influenced by characteristics of their mothers' early-life**  
2 **environments.** Offspring survived relatively less well during the juvenile period if (A) their  
3 mother lost her own mother during her early life and/or (B) their mother experienced a close-in-  
4 age younger sibling.

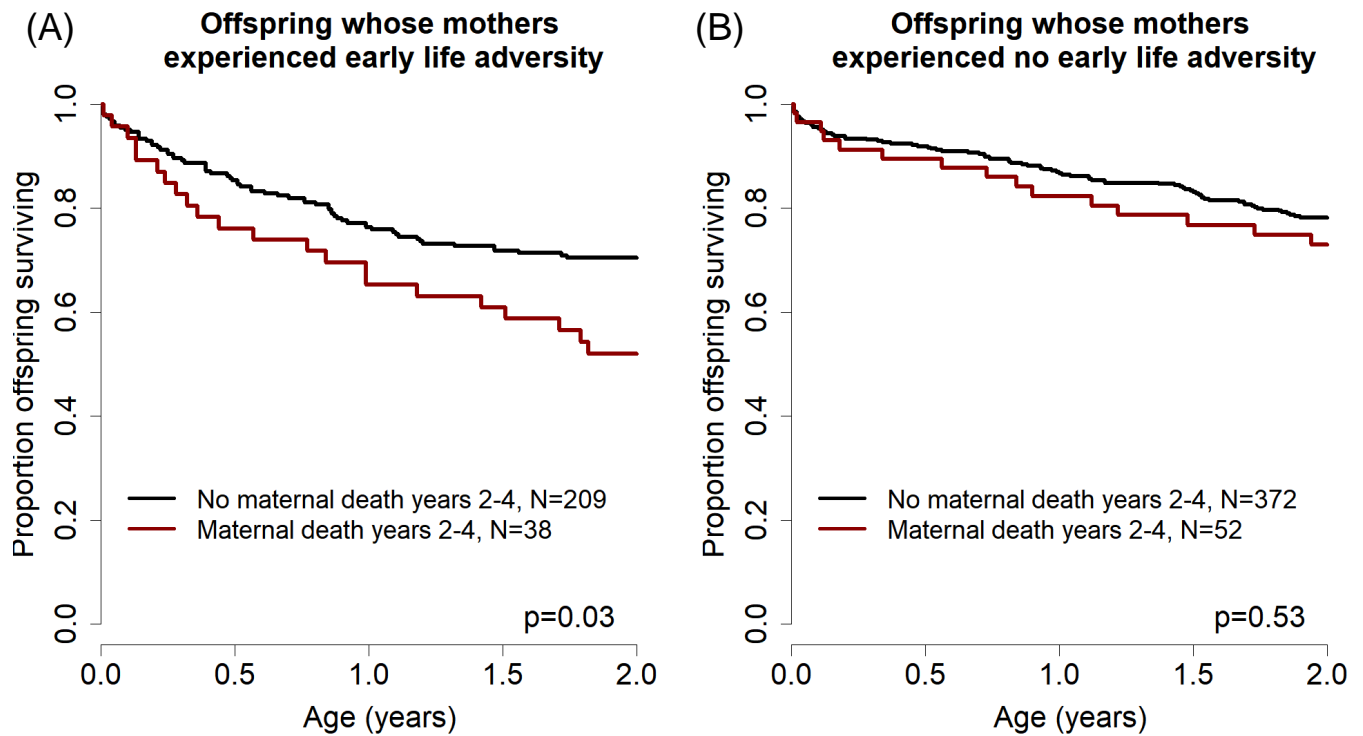

5 **Figure 2. Effects of maternal adversity on offspring survival are explained by reduced**  
6 **maternal viability.** (A) Among those offspring whose mothers experienced significant early life  
7 adversity (maternal loss and/or a competing younger sibling), maternal death in years 2-4 was  
8 associated with poor offspring survival in years 0-2 after birth, while the mother was still alive.  
9 (B) In contrast, among those offspring whose mothers did not experience early life adversity,  
10 maternal death in years 2-4 was not associated with reduced offspring survival during the first 2  
11 years of life.

1 **Table 1. Early adverse conditions and the frequencies with which they occur in maternal**  
2 **and offspring generations of our dataset.**

| <b>Adverse Condition<sup>a</sup></b> | <b>Criterion</b>                                                                                                                                 | <b>Frequency</b>           |                             |
|--------------------------------------|--------------------------------------------------------------------------------------------------------------------------------------------------|----------------------------|-----------------------------|
|                                      |                                                                                                                                                  | <i>Maternal Generation</i> | <i>Offspring Generation</i> |
| Drought                              | During the first year of life, the focal individual experienced less than 200 mm of rainfall (i.e., drought conditions (49)).                    | 0.09                       | 0.15                        |
| High Social Density                  | The individual was born into a group with a high social density (>35 adults), indicating high levels of within-group competition.                | 0.06                       | 0.32                        |
| Maternal Loss                        | The mother of the focal individual died within four years of the individual's birth.                                                             | 0.21                       | 0.25                        |
| Low Maternal Rank <sup>b</sup>       | The focal individual was born to a mother with a low social rank (mother's rank fell in the bottom quartile of the group's dominance hierarchy). | 0.17                       | 0.23                        |
| Close-In-Age Younger Sibling         | The focal individual had a younger sibling born to its mother within 18 months of the focal's birth.                                             | 0.20                       | --                          |

3 <sup>a</sup>These mirror criteria used in a previous analysis in our population (18), with the exception of  
4 rank, which is evaluated here as a proportional measure.

5 <sup>b</sup>Proportional rank is the proportion of other adult females in a group that an individual's mother  
6 outranks. An animal therefore has a low maternal rank if her mother's rank is <0.25. The reduced  
7 frequency with which low maternal rank appears in the maternal generation is a likely result of  
8 offspring of low-ranking mothers surviving less well (84), and therefore not surviving to appear  
9 as mothers in our dataset.

10
